# Supplementary material
Source: MDPI journal article supplement (https://www.mdpi.com/2227-9717/9/9/1669)
Supplement: s1 [file s1 › processes-1339184-supplementary.pdf]

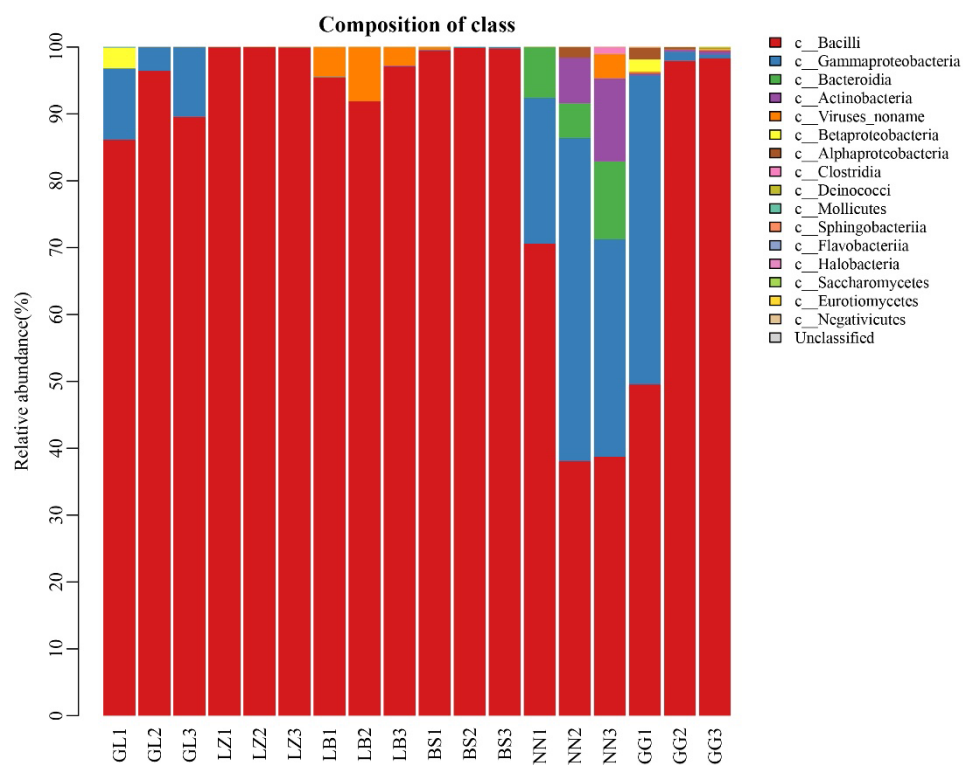

Figure S1. Class level colony distribution map.

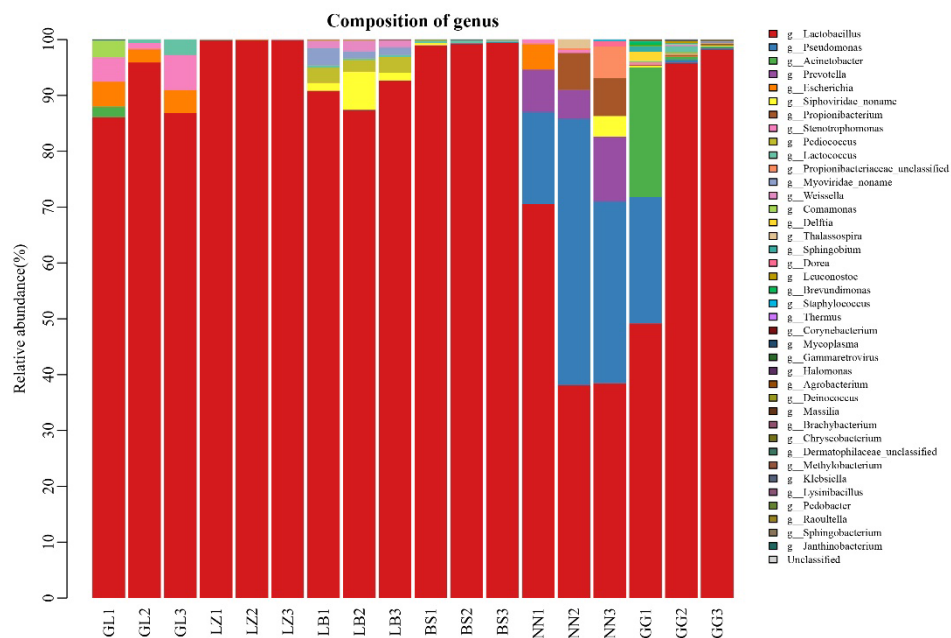

Figure S2. Genus level colony distribution map.

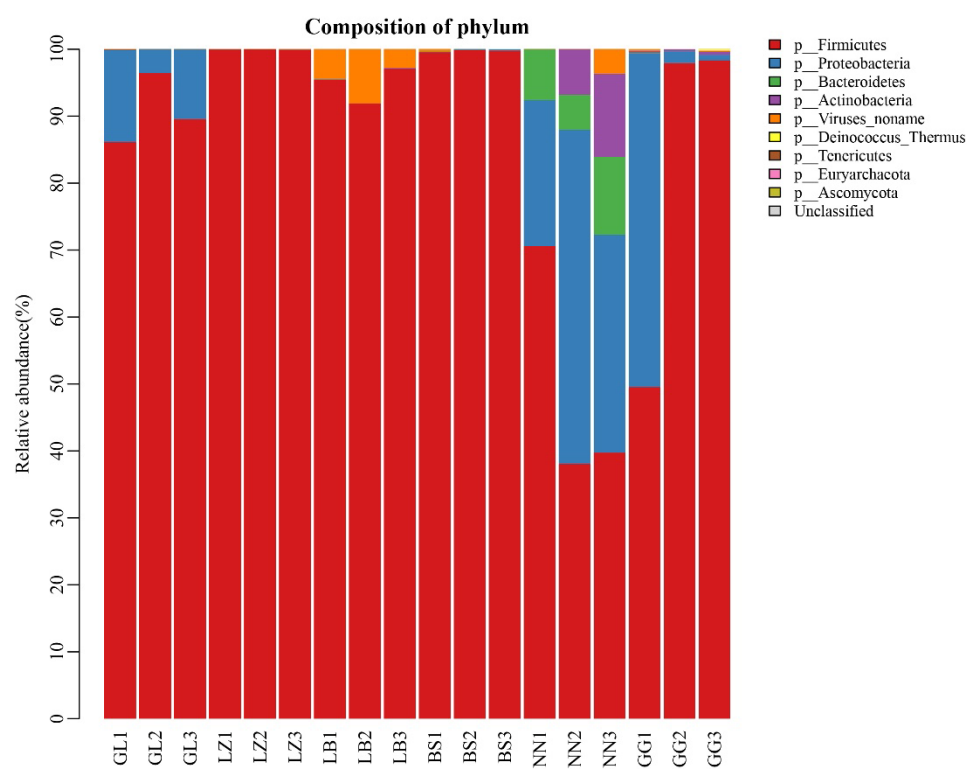

Figure S3. Phylum level colony distribution map.
